# Supplementary material for: Tectonic inheritance controls nappe detachment, transport and stacking in the Helvetic nappe system, Switzerland: insights from thermomechanical simulations
Source: Copernicus journal article supplement (doi:10.5194/se-11-287-2020), 2020-03-04
Supplement: Supplementary file 1 [file se-11-287-2020-supplement.zip]

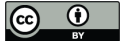

## *Supplement of*

# **Tectonic inheritance controls nappe detachment, transport and stacking in the Helvetic nappe system, Switzerland: insights from thermomechanical simulations**

**Dániel Kiss et al.**

*Correspondence to:* Dániel Kiss ([daniel.kiss@unil.ch](mailto:daniel.kiss@unil.ch))

- `se-11-287-2020-supplement-title-page.pdf`
- `ReferenceModel.mp4`
- `__MACOSX`
  - `._ReferenceModel.mp4`

The copyright of individual parts of the supplement might differ from the CC BY 4.0 License.
